# Supplementary material for: Role of the Sodium-Dependent Organic Anion Transporter (SOAT/SLC10A6) in Physiology and Pathophysiology
Source: MDPI journal article supplement (doi:10.3390/ijms24129926), 2023-06-08
Supplement: s1 [file s1]

# **Role of the sodium-dependent organic anion transporter (SOAT/SLC10A6) in physiology and pathophysiology**

Marie Wannowius <sup>1</sup>, Emre Karakus <sup>1</sup>, Zekeriya Aktürk <sup>2</sup>, Janina Breuer <sup>1</sup>, and Joachim Geyer <sup>1,\*</sup>

<sup>1</sup> Institute of Pharmacology and Toxicology, Faculty of Veterinary Medicine, Biomedical Research Center Seltersberg (BFS), Justus Liebig University of Giessen, Schubertstr. 81, 35392 Giessen, Germany; marie.t.wannowius@vetmed.uni-giessen.de (M.W.); emre.karakus@vetmed.uni-giessen.de (E.K.); janina.breuer@vetmed.uni-giessen.de (J.B.); joachim.m.geyer@vetmed.uni-giessen.de (J.G.)

<sup>2</sup> General Practice, Faculty of Medicine, University of Augsburg, 86159 Augsburg, Germany; zekeriya.akturk@gmail.com

\* Correspondence: joachim.m.geyer@vetmed.uni-giessen.de; Tel.: +49-641-9938404

## **Supplementary Material**

|                               |                                                                                                              |
|-------------------------------|--------------------------------------------------------------------------------------------------------------|
| <b>Supplementary Table S1</b> | Compounds with low or no inhibitory effect on SOAT.                                                          |
| <b>Supplementary Table S2</b> | Number of analyzed tissues for RNA-seq data generated by GTEx (exported 2022/03).                            |
| <b>Supplementary Table S3</b> | Internet sources of SOAT (SLC10A6) IHC images accessed via the Human Protein Atlas (V21.0.proteinatlas.org). |

**Supplementary Table S1.** Compounds with low or no inhibitory effect on SOAT.

| Test compound                       | Inhibitor IC <sub>50</sub> |
|-------------------------------------|----------------------------|
| <b>Bile acids</b>                   |                            |
| Dehydrocholic acid                  | n.d. [1]                   |
| <b>Naphthyl derivatives</b>         |                            |
| $\alpha$ -Naphthylamine             | n.d. [1]                   |
| $\alpha$ -Naphthylisothiocyanate    | n.d. [1]                   |
| $\alpha$ -Naphthylphosphate         | n.d. [1]                   |
| <b>Non-steroidal organosulfates</b> |                            |
| 2-Propylsulfate                     | n.d. [1]                   |
| 5-Sulfooxymethylfurfural            | n.d. [1]                   |
| Ethylsulfate                        | n.d. [1]                   |
| Hydroquinone sulfate                | n.d. [1]                   |
| Indoxylsulfate                      | n.d. [1]                   |
| Phenylethylsulfate                  | n.d. [1]                   |
| Phenylsulfate                       | n.d. [1]                   |
| <b>Steroids</b>                     |                            |
| Aldosterone                         | >1000 $\mu$ M [48]         |
| Androstendione                      | >1000 $\mu$ M [48]         |
| Androsterone                        | >1000 $\mu$ M [48]         |
| Cholesteryl sulfate                 | >1000 $\mu$ M [48]         |
| Corticosterone                      | >1000 $\mu$ M [48]         |
| Cortisol                            | >1000 $\mu$ M [48]         |
| Digitoxigenin                       | >1000 $\mu$ M [48]         |
| Digoxin                             | >1000 $\mu$ M [48]         |
| Dihydrotestosterone                 | >1000 $\mu$ M [48]         |
| 17 $\beta$ -Estradiol               | >1000 $\mu$ M [48]         |
| Estrone                             | >1000 $\mu$ M [48]         |
| Ethinylestradiol                    | ~900 $\mu$ M [48]          |
| Finasteride                         | >1000 $\mu$ M [48]         |
| Ouabain                             | >1000 $\mu$ M [48]         |
| Prednisolone                        | >1000 $\mu$ M [48]         |
| Prednisone                          | >1000 $\mu$ M [48]         |
| Progesterone                        | >1000 $\mu$ M [48]         |
| Testosterone                        | >1000 $\mu$ M [48]         |
| <b>Others</b>                       |                            |
| Ezetimibe                           | n.d. [14]                  |
| S 0381                              | ~1000 $\mu$ M [48]         |
| S 0925                              | ~1000 $\mu$ M [48]         |
| S 8005                              | ~1000 $\mu$ M [48]         |
| Wortmannin                          | >1000 $\mu$ M [48]         |

n.d. = not determined. The following [<sup>3</sup>H]DHEAS substrate concentrations were used: 2.5  $\mu$ M [1], 0.2  $\mu$ M [14, 48]. Where no IC<sub>50</sub> values were determined, 25  $\mu$ M [1] or 100  $\mu$ M [14] maximal inhibitory concentrations were used.

**Supplementary Table S2.** Number of analyzed tissues for RNA-seq data generated by GTEx (exported 2022/03).

| <b>Tissue</b>            | <b>Tissue expression data obtained via GTEx</b> | <b>Number of samples</b> |
|--------------------------|-------------------------------------------------|--------------------------|
| <b>Adipose tissue</b>    | Adipose - Subcutaneous                          | 663                      |
|                          | Adipose - Visceral (Omentum)                    | 541                      |
| <b>Adrenal gland</b>     | Adrenal Gland                                   | 258                      |
| <b>Amygdala</b>          | Brain - Amygdala                                | 152                      |
| <b>Breast</b>            | Breast - Mammary Tissue                         | 459                      |
| <b>Caudate</b>           | Brain - Caudate (basal ganglia)                 | 246                      |
| <b>Cerebellum</b>        | Brain - Cerebellar Hemisphere                   | 215                      |
|                          | Brain - Cerebellum                              | 241                      |
| <b>Cerebral cortex</b>   | Brain - Anterior cingulate cortex (BA24)        | 176                      |
|                          | Brain - Cortex                                  | 255                      |
|                          | Brain - Frontal Cortex (BA9)                    | 209                      |
| <b>Cervix</b>            | Cervix - Ectocervix                             | 9                        |
|                          | Cervix - Endocervix                             | 10                       |
| <b>Colon</b>             | Colon - Sigmoid                                 | 373                      |
|                          | Colon - Transverse                              | 406                      |
| <b>Endometrium</b>       | Uterus - Endometrium                            | 16                       |
| <b>Esophagus</b>         | Esophagus - Mucosa                              | 555                      |
| <b>Fallopian tube</b>    | Fallopian Tube                                  | 9                        |
| <b>Heart muscle</b>      | Heart - Atrial Appendage                        | 429                      |
|                          | Heart - Left Ventricle                          | 432                      |
| <b>Hippocampus</b>       | Brain - Hippocampus                             | 197                      |
| <b>Hypothalamus</b>      | Brain - Hypothalamus                            | 202                      |
| <b>Kidney</b>            | Kidney - Cortex                                 | 85                       |
|                          | Kidney - Medulla                                | 4                        |
| <b>Liver</b>             | Liver                                           | 226                      |
| <b>Lung</b>              | Lung                                            | 578                      |
| <b>Nucleus accumbens</b> | Brain - Nucleus accumbens (basal ganglia)       | 246                      |
| <b>Ovary</b>             | Ovary                                           | 180                      |
| <b>Pancreas</b>          | Pancreas                                        | 328                      |
| <b>Pituitary gland</b>   | Pituitary                                       | 283                      |
| <b>Prostate</b>          | Prostate                                        | 245                      |
| <b>Putamen</b>           | Brain - Putamen (basal ganglia)                 | 205                      |
| <b>Retina</b>            | Retina                                          | 105                      |
| <b>Salivary gland</b>    | Minor Salivary Gland                            | 162                      |
| <b>Skeletal muscle</b>   | Muscle - Skeletal                               | 803                      |
| <b>Skin</b>              | Skin - Not Sun Exposed (Suprapubic)             | 604                      |
|                          | Skin - Sun Exposed (Lower leg)                  | 701                      |
| <b>Small intestine</b>   | Small Intestine - Terminal Ileum                | 187                      |
| <b>Spinal cord</b>       | Brain - Spinal cord (cervical c-1)              | 159                      |
| <b>Spleen</b>            | Spleen                                          | 241                      |
| <b>Stomach</b>           | Stomach                                         | 359                      |
| <b>Substantia nigra</b>  | Brain - Substantia nigra                        | 139                      |
| <b>Testis</b>            | Testis                                          | 361                      |
| <b>Thyroid gland</b>     | Thyroid                                         | 653                      |
| <b>Urinary bladder</b>   | Bladder                                         | 21                       |
| <b>Vagina</b>            | Vagina                                          | 156                      |

**Supplementary Table S3.** Internet sources of SOAT (SLC10A6) IHC images accessed via the Human Protein Atlas (V21.0.proteinatlas.org).

| Normal Tissue               | URL: <a href="http://www.proteinatlas.org">www.proteinatlas.org</a> ... | Patient ID |
|-----------------------------|-------------------------------------------------------------------------|------------|
| <b>Breast</b>               | /ENSG00000145283-SLC10A6/tissue/breast#img                              | 3544       |
| <b>Bronchus</b>             | /ENSG00000145283-SLC10A6/tissue/bronchus#img                            | 3482       |
| <b>Cervix</b>               | /ENSG00000145283-SLC10A6/tissue/cervix#img                              | 3313       |
| <b>Esophagus</b>            | /ENSG00000145283-SLC10A6/tissue/esophagus#img                           | 3197       |
| <b>Nasopharynx</b>          | /ENSG00000145283-SLC10A6/tissue/nasopharynx#img                         | 2688       |
| <b>Oral mucosa</b>          | /ENSG00000145283-SLC10A6/tissue/oral+mucosa#img                         | 2550       |
| <b>Prostate</b>             | /ENSG00000145283-SLC10A6/tissue/prostate#img                            | 2053       |
| <b>Skin</b>                 | /ENSG00000145283-SLC10A6/tissue/skin#img                                | 3403       |
| <b>Stomach</b>              | /ENSG00000145283-SLC10A6/tissue/stomach#img                             | 2130       |
| <b>Tonsil</b>               | /ENSG00000145283-SLC10A6/tissue/tonsil#img                              | 2615       |
| <b>Vagina</b>               | /ENSG00000145283-SLC10A6/tissue/vagina#img                              | 2480       |
| Cancer Tissue               | URL: <a href="http://www.proteinatlas.org">www.proteinatlas.org</a> ... | Patient ID |
| <b>Pancreas Carcinoid</b>   | /ENSG00000145283-SLC10A6/pathology/carcinoid#img                        | 2618       |
| <b>Lung Cancer</b>          | /ENSG00000145283-SLC10A6/pathology/lung+cancer#img                      | 2354       |
| <b>Skin Cancer</b>          | /ENSG00000145283-SLC10A6/pathology/skin+cancer#img                      | 3520       |
| <b>Cervix Cancer</b>        | /ENSG00000145283-SLC10A6/pathology/cervical+cancer#img                  | 470        |
| <b>Head and Neck Cancer</b> | /ENSG00000145283-SLC10A6/pathology/head+and+neck+cancer#img             | 1743       |
| <b>Urothelial Cancer</b>    | /ENSG00000145283-SLC10A6/pathology/urothelial+cancer#img                | 1871       |

## References

- Geyer, J.; Döring, B.; Meerkamp, K.; Ugele, B.; Bakhiya, N.; Fernandes, C.F.; Godoy, J.R.; Glatt, H.; Petzinger, E. Cloning and functional characterization of human sodium-dependent organic anion transporter (SLC10A6). *J Biol Chem* **2007**, *282*, 19728-19741, doi:10.1074/jbc.M702663200.
- Grosser, G.; Müller, S.F.; Kirstgen, M.; Döring, B.; Geyer, J. Substrate Specificities and Inhibition Pattern of the Solute Carrier Family 10 Members NTCP, ASBT and SOAT. *Front Mol Biosci* **2021**, *8*, 689757, doi:10.3389/fmolb.2021.689757.
- Grosser, G.; Baringhaus, K.H.; Döring, B.; Kramer, W.; Petzinger, E.; Geyer, J. Identification of novel inhibitors of the steroid sulfate carrier 'sodium-dependent organic anion transporter' SOAT (SLC10A6) by pharmacophore modelling. *Mol Cell Endocrinol* **2016**, *428*, 133-141, doi:10.1016/j.mce.2016.03.028.
